# Supplementary material for: Selection of Orphan Rhs Toxin Expression in Evolved Salmonella enterica Serovar Typhimurium
Source: PubMed Central journal article supplement (PMC3967940; doi:10.1371/journal.pgen.1004255), 2014-03-27

**Fig. S1**

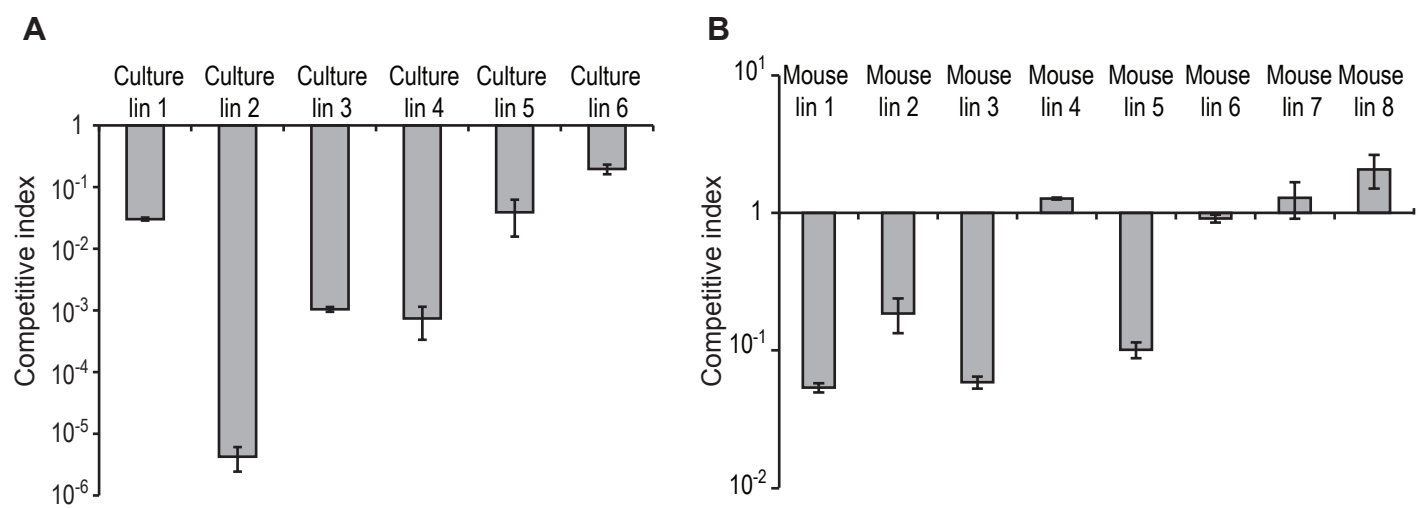

Supplement: pgen.1004255.s001.pdf [file pgen.1004255.s001.pdf]
